# Supplementary material for: Monocyte Subsets in Patients with Chronic Heart Failure Treated with Cardiac Resynchronization Therapy
Source: MDPI journal article supplement (doi:10.3390/cells10123482), 2021-12-09
Supplement: s1 [file s1]

|                              |        |        |        |        |                |                |                |                |        |                |       |           |                |           |   |
|------------------------------|--------|--------|--------|--------|----------------|----------------|----------------|----------------|--------|----------------|-------|-----------|----------------|-----------|---|
| <b>BNP</b>                   | 0.090  | 0.016  | -0.126 | -0.007 | -<br>0.39<br>3 | 0.01<br>9      | 1              |                |        |                |       |           |                |           |   |
| <b>LVEDD</b>                 | 0.003  | 0.233  | -0.125 | -0.066 | -<br>0.16<br>4 | -<br>0.16<br>8 | 0.24<br>6      | 1              |        |                |       |           |                |           |   |
| <b>TWEAK</b>                 | -0.235 | -0.167 | 0.314  | 0.151  | -<br>0.26<br>1 | 0.06<br>7      | -<br>0.03<br>0 | -<br>0.18<br>3 | 1      |                |       |           |                |           |   |
| <b>TSLP</b>                  | -0.458 | -0.382 | 0.620  | -0.207 | -<br>0.00<br>5 | 0.79<br>1      | -<br>0.10<br>6 | -<br>0.17<br>2 | -0.055 | 1              |       |           |                |           |   |
| <b>Total<br/>cholesterol</b> | 0.180  | 0.157  | -0.320 | 0.201  | -<br>0.02<br>5 | -<br>0.29<br>0 | -<br>0.02<br>4 | 0.03<br>3      | -0.192 | -<br>0.25<br>0 | 1     |           |                |           |   |
| <b>Iron</b>                  | 0.138  | 0.125  | -0.370 | 0.831  | 0.02<br>3      | -<br>0.30<br>4 | -<br>0.06<br>8 | -<br>0.05<br>0 | 0.269  | -<br>0.34<br>4 | 0.335 | 1         |                |           |   |
| <b>MDC</b>                   | 0.219  | 0.165  | -0.405 | 0.053  | -<br>0.19<br>7 | -<br>0.13<br>6 | 0.20<br>2      | 0.30<br>3      | -0.015 | -<br>0.49<br>5 | 0.024 | 0.14<br>3 | 1              |           |   |
| <b>Peak VO2</b>              | -0.123 | 0.037  | 0.040  | 0.016  | 0.23<br>1      | -<br>0.02<br>5 | -<br>0.30<br>6 | 0.13<br>7      | 0.110  | -<br>0.00<br>7 | 0.100 | 0.03<br>7 | 0.02<br>9      | 1         |   |
| <b>LVEF</b>                  | -0.109 | 0.065  | 0.009  | -0.004 | 0.15<br>3      | 0.03<br>6      | -<br>0.31<br>6 | -<br>0.32<br>6 | 0.236  | -<br>0.26<br>7 | 0.005 | 0.02<br>0 | -<br>0.11<br>9 | 0.34<br>3 | 1 |

*Abbreviations:* BNP, brain natriuretic peptide; IP-10, interferon gamma-induced protein 10; IL-31, interleukin 31; LVEDD, left ventricular end-diastolic diameter; LVEF, left ventricular ejection fraction; MDC, macrophage-derived chemokine; peak VO2, peak oxygen uptake; sTWEAK, soluble tumor necrosis factor-like weak inducer of apoptosis; TSLP, thymic stromal lymphopoietin

Data are presented as R – correlation coefficient value. Statistically significant parameters R – correlation coefficient for  $p < 0.05$  are marked in red.
